# Supplementary material for: NOD2 up-regulates TLR2-mediated IL-23p19 expression via NF-κB subunit c-Rel in Paneth cell-like cells
Source: PubMed Central journal article supplement (PMC5325392; doi:10.18632/oncotarget.11467), 2016-08-22
Supplement: oncotarget-07-63651-s001.pdf [file oncotarget-07-63651-s001.pdf]

## NOD2 up-regulates TLR2-mediated IL-23p19 expression via NF- $\kappa$ B subunit c-Rel in Paneth cell-like cells

### SUPPLEMENTARY FIGURES

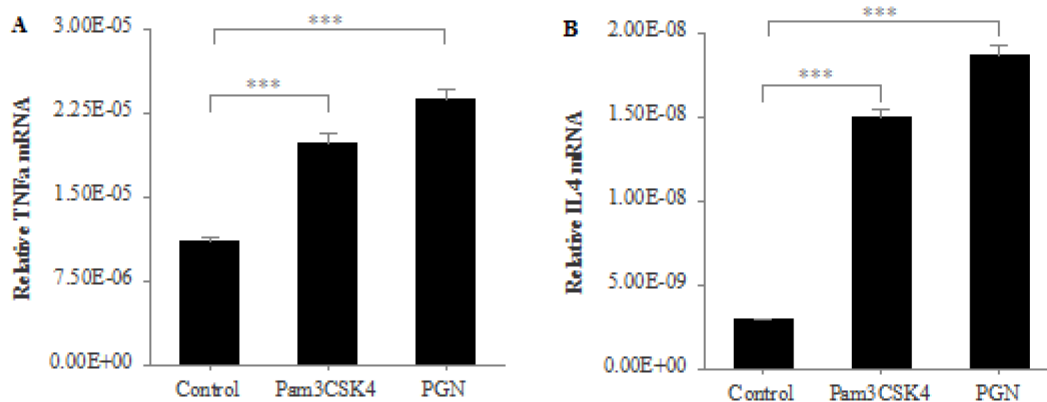

**Supplementary Figure S1: TLR2-mediated induction mRNA expression of TNF $\alpha$  A. and IL-4 B. in PC-like cells.** PC-like cells were stimulated with 10  $\mu$ g/ml PGN and 1  $\mu$ g/ml Pam3CSK4 for 4h, then total RNA was isolated and the mRNA expression of TNF $\alpha$  and IL-4 was determined by real-time PCR and normalized to 18 S rRNA. Data are shown as means  $\pm$  SD of three independent experiments. \*\*\* $P \leq 0.001$ .

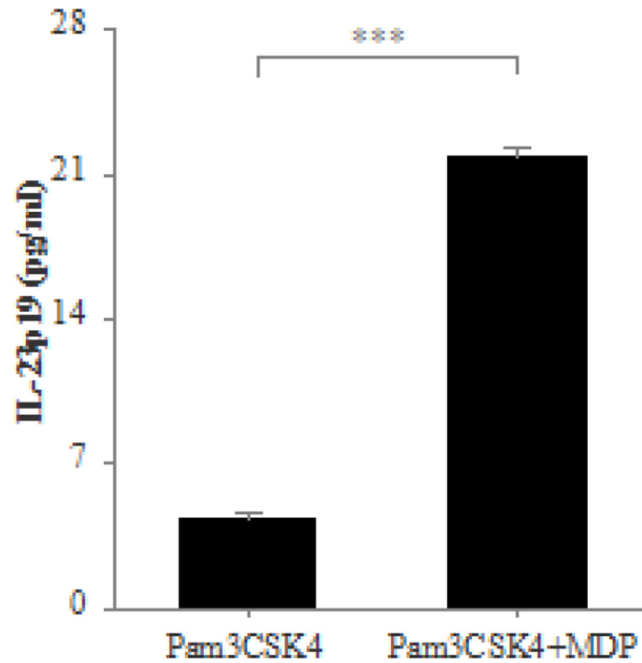

**Supplementary Figure S2: Up-regulation of TLR2-mediated expression of IL-23p19 by NOD2 in PC-like cells.** PC-like cells ( $5 \times 10^5$ /ml) were stimulated by Pam3CSK4 (1  $\mu$ g/ml) with or without MDP (10  $\mu$ g/ml). Culture supernatants were collected at 48 h and assayed for IL-23p19 production by ELISA kits (ebioscience). Data are shown as means  $\pm$  SD of three independent experiments. \*\*\* $P \leq 0.001$ .
